# Supplementary material for: A new sodiation–desodiation mechanism of the titania-based negative electrode for sodium-ion batteries
Source: Royal Society of Chemistry journal article supplement (doi:10.1039/c6cp05944a), 2016-01-01
Supplement: c6cp05944a1.pdf [file c6cp05944a1.pdf]

## SUPPLEMENTARY INFORMATION

### **A new sodiation-desodiation mechanism of titania-based negative electrode for sodium-ion battery**

Changsheng Ding<sup>a</sup>, Toshiyuki Nohira<sup>b,\*</sup> and Rika Hagiwara<sup>a,\*</sup>

<sup>a</sup> Graduate School of Energy Science, Kyoto University, Sakyo-ku, Kyoto 606-8501, Japan

<sup>b</sup> Institute of Advanced Energy, Kyoto University, Uji 611-0011, Japan

\*Correspondence to: nohira.toshiyuki.8r@kyoto-u.ac.jp  
hagiwara@energy.kyoto-u.ac.jp

## Experimental

### Synthesis of cubic $\text{Na}_2\text{TiO}_3$ powders

NaOH (Wako) and anatase  $\text{TiO}_2$  nanopowders (Sigma Aldrich) were used as raw materials to synthesize cubic  $\text{Na}_2\text{TiO}_3$  ( $\alpha\text{-Na}_2\text{TiO}_3$ ) powders. The NaOH was first dissolved with pure water to form a 70 wt% solution in an  $\text{Al}_2\text{O}_3$  crucible. The  $\text{TiO}_2$  nanopowders were then dispersed into the NaOH solution by stirring. The mass ratio of NaOH and  $\text{TiO}_2$  is 1.3:1. Finally, the mixture was put into an electric furnace and heated at 550 °C for 1 h. The calcined white sample was ground using a mortar and pestle to obtain  $\text{Na}_2\text{TiO}_3$  powders, which were stored in an Ar-filled glove box until use.

### Heating of $\text{Na}_2\text{TiO}_3$ -TiO powders

Cubic TiO powders (High Purity Chemicals) and cubic  $\text{Na}_2\text{TiO}_3$  powders with a molar ratio of 1:1 were ball-milled with dry type for 12 h at 600 rpm. The ball-milled mixture was heated at 200-600 °C for 5 h in Ar gas flow. The structure of the heated powders was investigated by means of X-ray diffraction (XRD, Rigaku SmartLab).

### Electrode fabrication

Amorphous  $\text{TiO}_2$  nanopowders (Alfa Aesar), cubic TiO powders and cubic  $\text{Na}_2\text{TiO}_3$  powders with a molar ratio of 8:1:1 were ball-milled with dry type for 12 h at 600 rpm. The ball-milled  $\text{TiO}_2$ - $\text{Na}_2\text{TiO}_3$ -TiO powders were then dried in vacuum at 120 °C overnight before being transferred into an Ar-filled glove box. And then, the  $\text{TiO}_2$ - $\text{Na}_2\text{TiO}_3$ -TiO powders was mixed well with graphite and polytetrafluoroethylene (PTFE) at a weight ratio of 75:15:10 using a mortar and pestle to form a thin film, which was pressed onto an aluminium mesh current collector to form  $\text{TiO}_2/\text{Na}_2\text{TiO}_3/\text{TiO}$  working electrode.  $\text{Na}_2\text{TiO}_3/\text{TiO}$  working electrode was fabricated using the same method.

For comparison, amorphous  $\text{TiO}_2$  working electrode was also fabricated using a conventional coating method. A slurry consisting of  $\text{TiO}_2$  active material (75 wt%), graphite (15 wt%), and polyamide-imide (10 wt%) in *N*-methyl-2-pyrrolidone (NMP) was uniformly spread onto an Al foil. The electrodes were dried in vacuum at 120 °C overnight before being transferred into an Ar-filled glove box.

### Electrochemical characterization

Charge-discharge tests were performed using a coin-type 2032 cell with a sodium foil counter electrode. The electrolyte used was the  $\text{Na}[\text{FSA}]\text{-}[\text{C}_3\text{C}_1\text{pyrr}][\text{FSA}]$  ionic liquid with molar ratio of 2:8. A glass fiber filter (Whatman, GF-A, 260 mm) was used as a separator. The working electrodes and separators were vacuum-impregnated with  $\text{Na}[\text{FSA}]\text{-}[\text{C}_3\text{C}_1\text{pyrr}][\text{FSA}]$  at 60 °C before assembling the cells. Charge-discharge testing was conducted at constant current rates of 20 mA  $\text{g}^{-1}$  in the voltage range of 0.01-2.5 V at 90 °C.

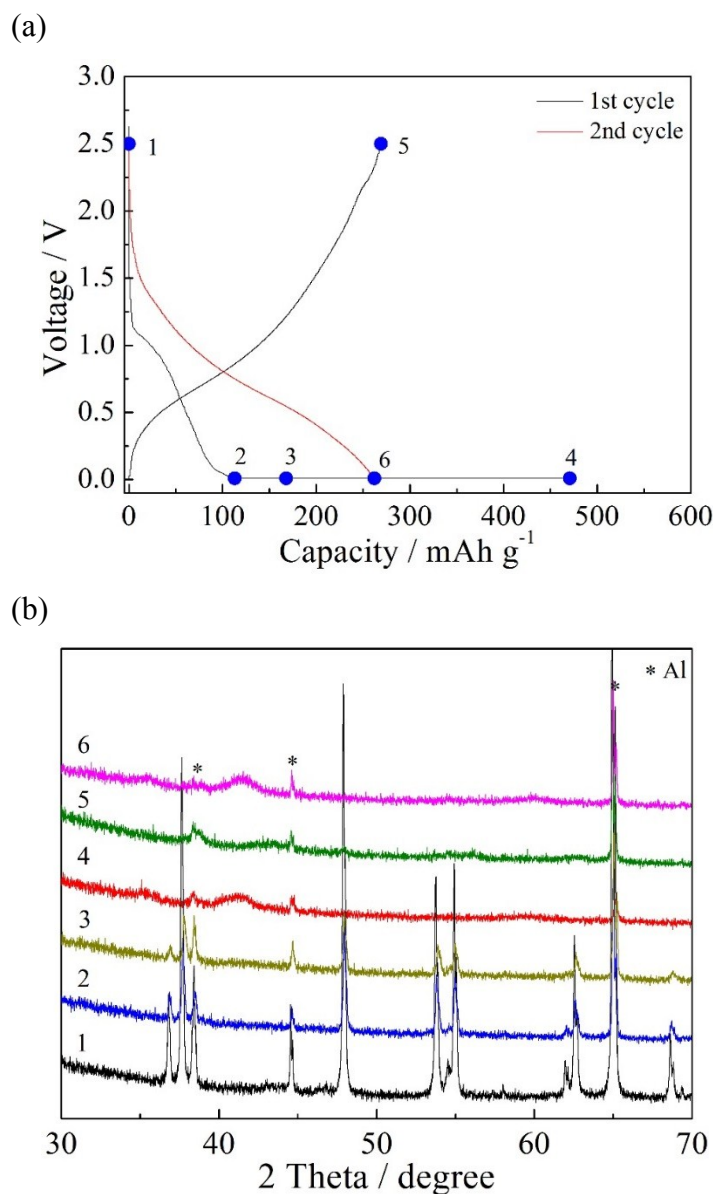

**Fig. S1.** Electrochemical and structural characterization of the  $\text{TiO}_2/\text{C}$  electrode: (a) Charge-discharge curves by means of CC-CV charge (CC:  $1000 \text{ mA g}^{-1}$  to  $0.01 \text{ V}$ ; CV:  $0.01 \text{ V}$  until  $1 \text{ mA g}^{-1}$  cutoff current), CC discharge ( $20 \text{ mA g}^{-1}$ ), and subsequent CC charge-discharge at  $20 \text{ mA g}^{-1}$ . (b) Ex-situ XRD patterns of the  $\text{TiO}_2/\text{C}$  electrodes at various charge/discharge stages as indicated in (a).

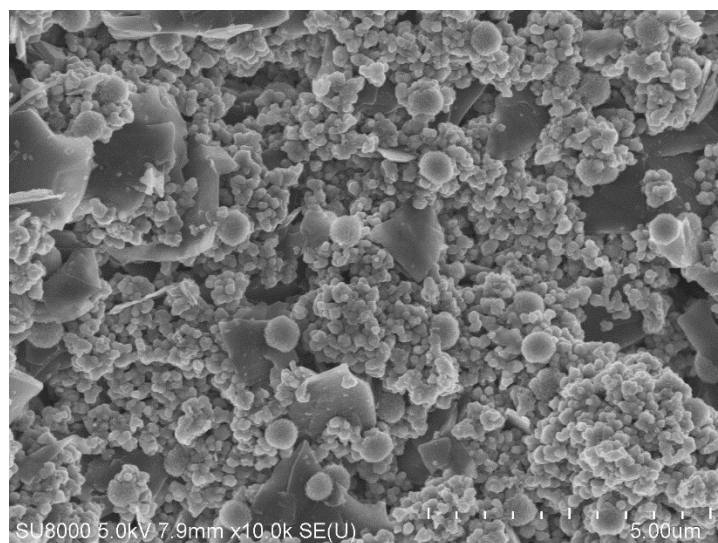

**Fig. S2.** SEM image of the TiO<sub>2</sub>/C electrode charged to 0.01 V by CC-CV mode.

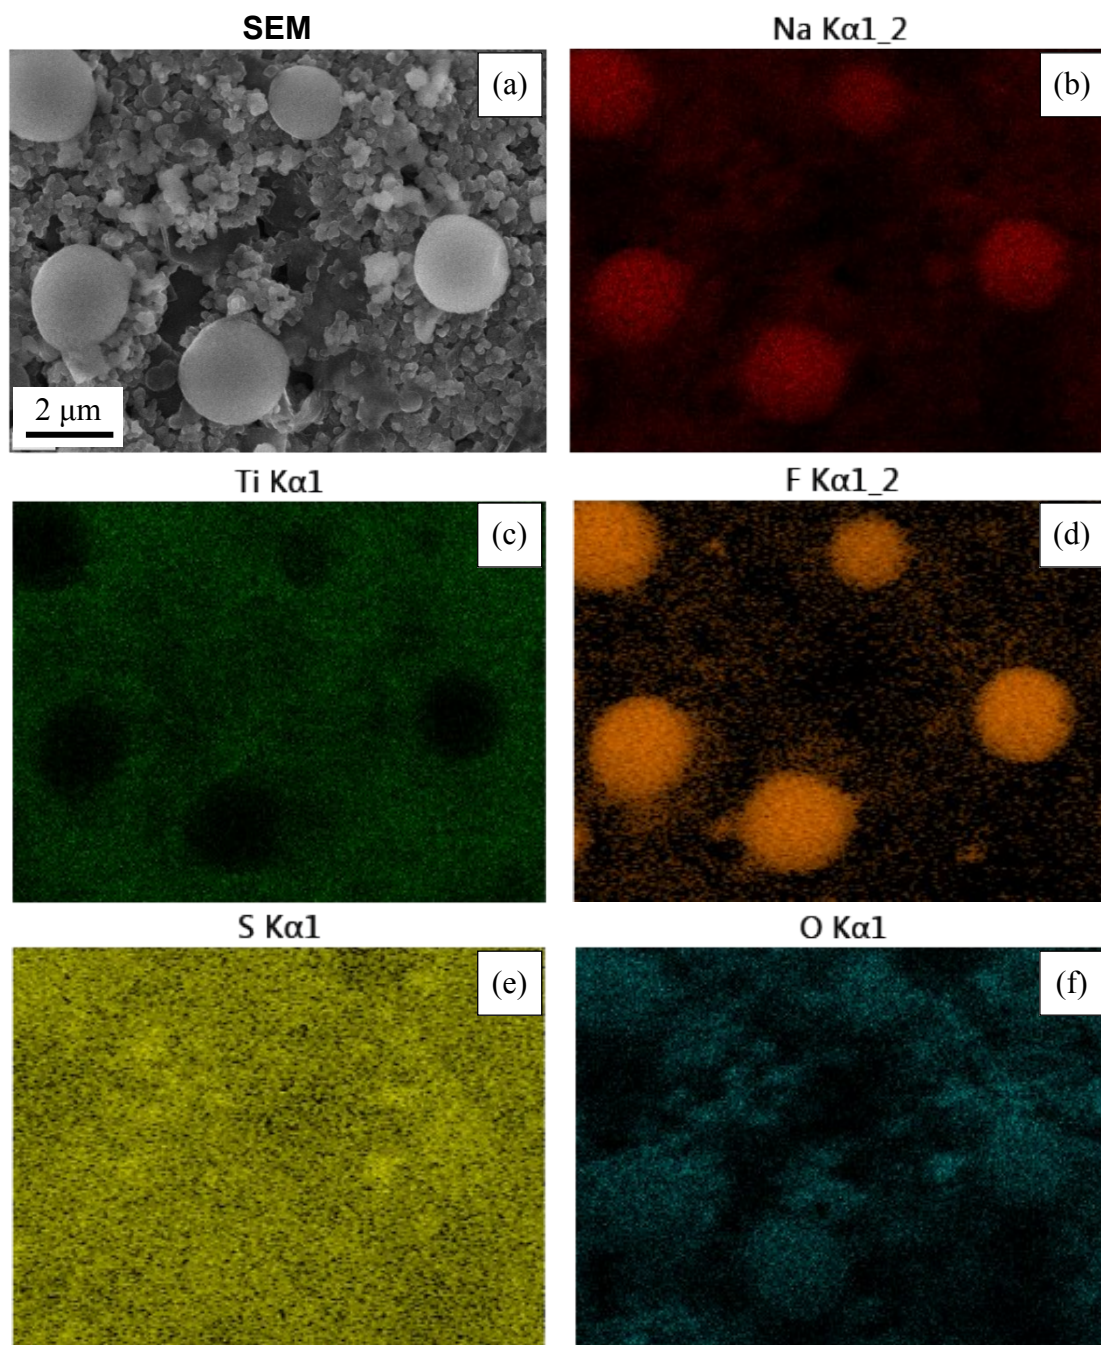

**Fig. S3.** EDX mapping analysis of the  $\text{TiO}_2/\text{C}$  electrode charged to 0.01 V: (a) SEM image, (b-f) The elemental mappings for Na, Ti, F, S and O, respectively.

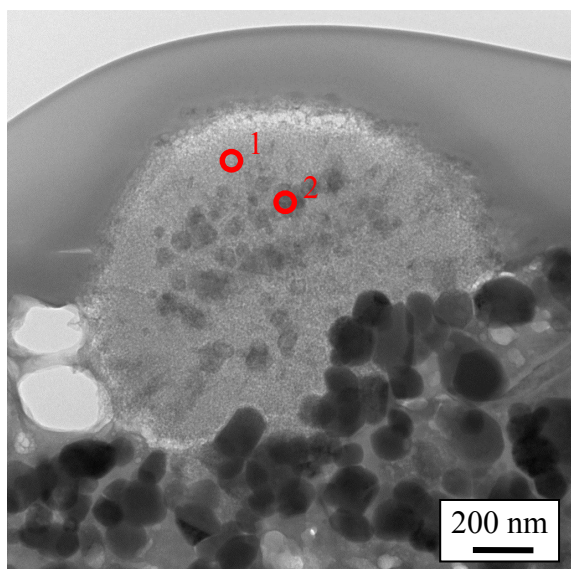

| Element | Point 1 | Point 2 |
|---------|---------|---------|
| O       | 10.5    | 6.1     |
| F       | 30.2    | 36.7    |
| S       | 7.3     | 8.4     |
| Na      | 52.0    | 48.8    |

**Fig. S4.** TEM-EDX point analysis of the  $\text{TiO}_2/\text{C}$  electrode charged to 0.01 V.

**Table S1:** The d values calculated from electron diffraction pattern of the  $\text{TiO}_2/\text{C}$  electrode discharged to 2.5 V.

| Discharged $\text{TiO}_2/\text{C}$ electrode |      | Cubic $\text{TiO}$<br>Card No: 00-008-0117 |       |     |
|----------------------------------------------|------|--------------------------------------------|-------|-----|
| Spot                                         | d    | 2theta                                     | d     | I   |
| 1                                            | 2.39 | 37.33                                      | 2.407 | 45  |
| 2                                            | 2.07 | 43.36                                      | 2.085 | 100 |
| 3                                            | 1.47 | 62.96                                      | 1.475 | 50  |
| -                                            | -    | 75.44                                      | 1.259 | 14  |
| 4                                            | 1.19 | 79.47                                      | 1.205 | 12  |
| 5                                            | 1.03 | 95.09                                      | 1.044 | 6   |

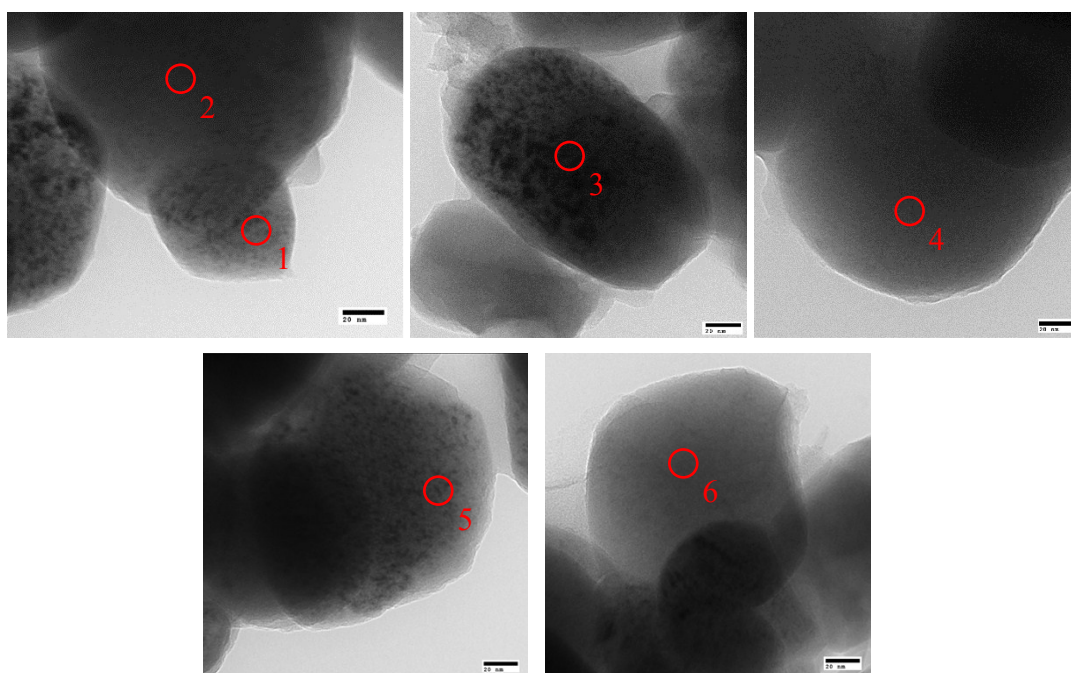

**Fig. S5.** TEM images of the  $\text{TiO}_2/\text{C}$  electrode discharged to 2.5 V for EDX point analysis (Table S2).

**Table S2:** TEM-EDX point analysis results of the  $\text{TiO}_2/\text{C}$  electrode discharged to 2.5 V, and calculated molar ratio of Na, Ti and O.

|         | <b>O-K</b> | <b>Na-K</b> | <b>Ti-K</b> | <b>Na</b>   | <b>Ti</b> | <b>O</b> |
|---------|------------|-------------|-------------|-------------|-----------|----------|
|         | at%        | at%         | at%         | molar ratio |           |          |
| Point 1 | 66.5       | 7.7         | 25.9        | 0.30        | 1         | 2.6      |
| Point 2 | 54.9       | 9.6         | 35.5        | 0.27        | 1         | 1.5      |
| Point 3 | 63.8       | 8.4         | 27.9        | 0.30        | 1         | 2.3      |
| Point 4 | 61.6       | 10.5        | 27.9        | 0.38        | 1         | 2.2      |
| Point 5 | 60.5       | 10.1        | 29.4        | 0.35        | 1         | 2.1      |
| Point 6 | 65.7       | 8.1         | 26.2        | 0.31        | 1         | 2.5      |

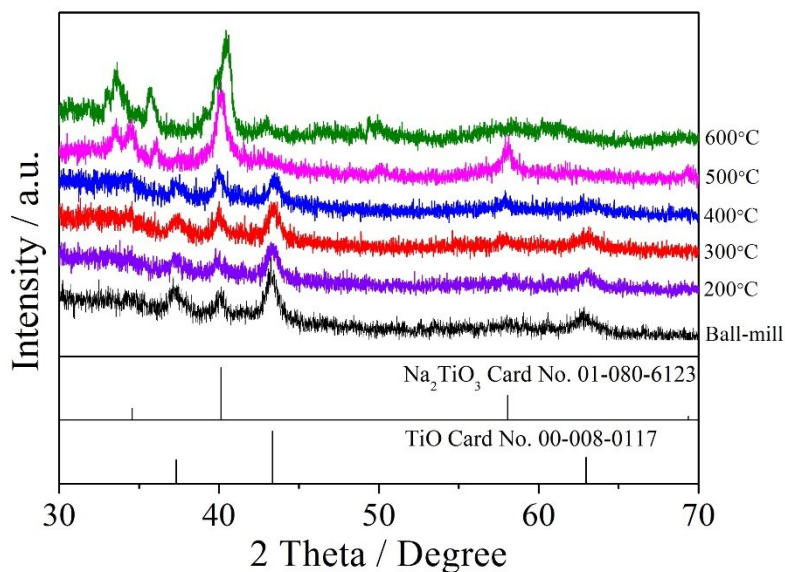

**Fig. S6.** XRD patterns of ball-milled cubic  $\text{Na}_2\text{TiO}_3$  and  $\text{TiO}$  powders heated at 200-600 °C in Ar gas flow.

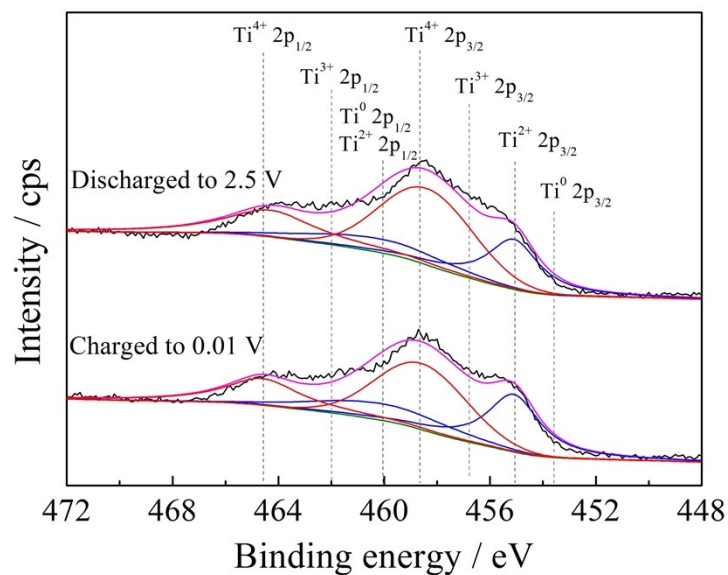

**Fig. S7:** Ti 2p XPS spectra of  $\text{TiO}_2/\text{C}$  electrode charged to 0.01 V and  $\text{TiO}_2/\text{C}$  electrode discharged to 2.5 V, after  $\text{Ar}^+$  etching. (The binding energies of  $\text{Ti}^{4+}$ ,  $\text{Ti}^{3+}$ ,  $\text{Ti}^{2+}$  and  $\text{Ti}^0$  come from NIST X-ray Photoelectron Spectroscopy Database.)

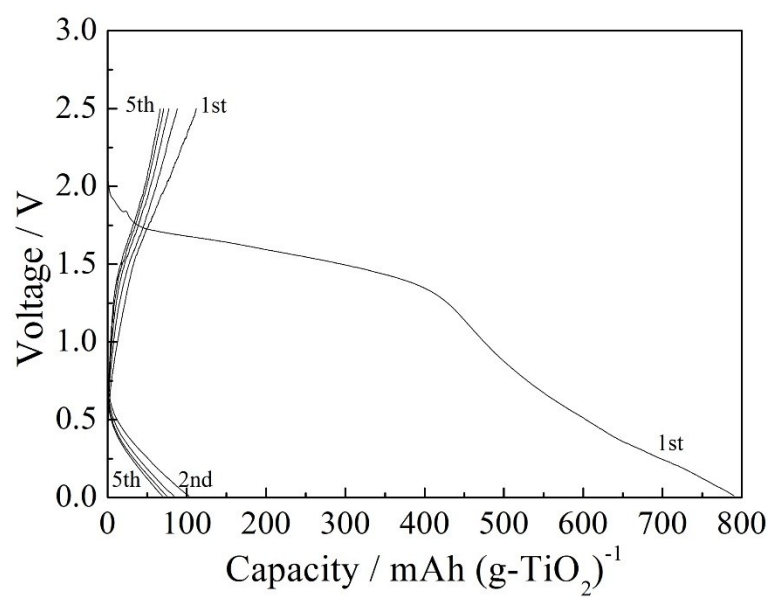

**Fig. S8.** Charge-discharge curves of the  $\text{TiO}_2$  (amorphous) electrode at  $20 \text{ mA g}^{-1}$ .

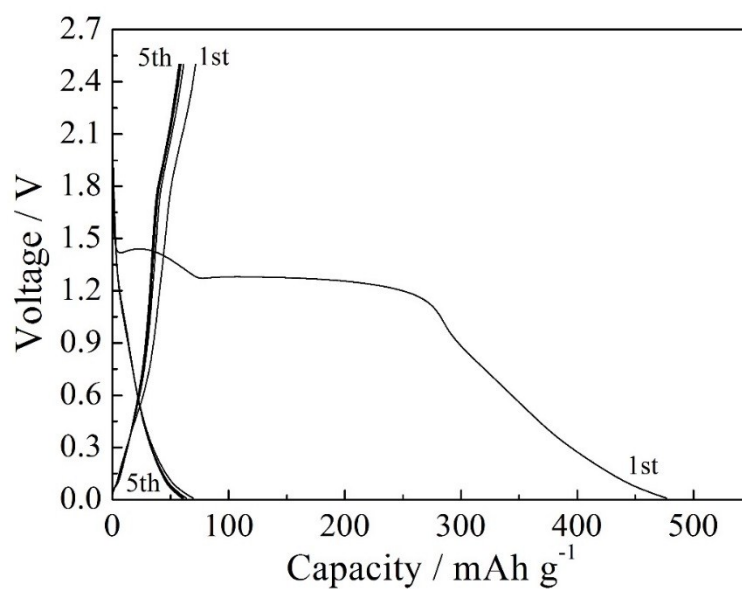

**Fig. S9.** Charge-discharge curves of the  $\text{Na}_2\text{TiO}_3/\text{TiO}$  electrode at  $20 \text{ mA g}^{-1}$ .
